# Supplementary material
Source: PubMed Central journal article supplement (PMC2575660)
Supplement: NIHMS69911-supplement-supplement.pdf [file NIHMS69911-supplement-supplement.pdf]

**METHODS: MAGNETIC RESONANCE IMAGING AND ANALYSIS**MRI Scan Acquisition

Ten normal right-handed, neurologically normal female control subjects age 20-29 and one female, right-handed, traumatic brain injury patient, age 21 were imaged identically. All participants were scanned with a 3T Allegra MRI scanner (Siemens, Erlangen, Germany). Participants were instructed to stay awake with their eyes open and to not perform any specific cognitive task (e.g., mental arithmetic, meditation). Conventional structural imaging included a high-resolution (1x1x1.25 mm) T1 sagittal magnetization-prepared rapid gradient-echo (MP-RAGE), a T2-weighted sagittal fast spin echo, and an axial fluid attenuated inversion recovery (FLAIR) scan. Resting state fMRI fluctuation data were acquired using a T2\* weighted echo-planar sequence (3 runs × 5 minutes) sensitive to blood oxygenation level dependent (BOLD) contrast. Diffusion tensor imaging (DTI) is detailed below. Total scanning time was approximately 1 hour/subject.

Diffusion Tensor Imaging

DTI involves measuring the diffusion properties of water, which are strongly dependent on local tissue micro-structure (1). Thus, in normal myelinated white matter, diffusion is highly anisotropic (directionally dependent) because water molecules tend to move parallel as opposed to perpendicular to fiber tracts. Prior studies in humans (2-10) as well as in animal models (11-15) of traumatic brain injury have shown that DTI parameters appear to be sensitive to changes following trauma.

The present DTI methodology is similar to that previously described by Shimony et al 2006 (16). Diffusion weighted images were sensitized in 48 directions using a locally modified echo planar imaging (EPI) sequence (TR=6400ms, TE=87ms, 1.5 x 1.5 x 1.5 mm voxels). 12 directions of diffusion were acquired at  $b=800$ , 1000 and 1200  $s/mm^2$ , and 6 directions of diffusion were acquired at  $b=600$  and 1400  $s/mm^2$ . Diffusion tensor parameters were measured in regions of interest (ROI) traced on each subject's MP-RAGE image. Accordingly, the first image processing step was to define the spatial relationships between all images in terms of affine transforms computed by image registration. Multimodal (e.g., T2W/T1W) image registration was performed using vector gradient measure (VGM) maximization (17). The first acquired, unsensitized ( $b = \sim 0 s/mm^2$ ; I0) DTI volume was registered to the T2W image; stretch and shear were enabled (12-parameter affine transform) to partially compensate for EPI distortion. Atlas transformation was computed via the T1 weighted image, which itself was registered to an atlas representative target produced by mutual coregistration of MP-RAGE images from a separate group of 12 normal young adults. The atlas target conformed to the Talairach system (18). Algebraic composition of transforms (matrix multiplication) enabled resampling any data type in register with any other (19). Thus, ROI generated on anatomical images were resampled in register with the DTI data for purposes of white matter tract selection and DTI parameter measurement.

Diffusion tensor tracking (DTT) was performed using a streamline algorithm (21, 22). The procedure for defining a volume using DTT was previously described (16). Start and end ROIs were selected visually in the cingulum bundle on coronal DTI images at the anterior and posterior margins of the corpus callosum. Cingulum bundle tracks were required to pass through both ROIs. A visitation count was calculated for every voxel based on how many of the filtered tracks pass through it. The cingulum bundle volume was defined as the collection of voxels with a visitation count above 25% of the

total number of tracks. These volumes were inspected visually in each subject for location and size. The final DTI parameter values were determined by averaging over the final volume in each subject.

Relative anisotropy was measured bilaterally in the fornix. To this end, ROIs were manually traced using Analyze 6.1 (Mayo Foundation, Rochester, Minn) on individual subject RA images while simultaneously viewing the coregistered MP-RAGE. Structure boundaries were determined according to Woolsey et al. (20).

### Resting-State fMRI correlation analysis

Intrinsic fluctuations of the blood oxygen level dependent (BOLD) signal normally are correlated within anatomically connected and functionally related cortical regions (23-25). Thus, we hypothesized that traumatic axonal injury severe enough to cause clinical deficits should be accompanied by abnormal *functional connectivity* between the affected regions. To test this hypothesis, we studied the correlation structure of low frequency (<0.1 Hz) fluctuations of the blood oxygen level dependent (BOLD) signal acquired in the resting state. This technique has also been referred to as functional correlation MRI (fcMRI). A major advantage of this approach is that it does not rely on the subject's task performance. Subjects who are cognitively impaired or uncooperative can be studied without the confound of variable task performance. Moreover, as the correlation structure of spontaneous BOLD fluctuations is minimally affected by light sleep (26) and persists (albeit in somewhat altered form) even under anesthesia (27). The BOLD data required for fcMRI can be acquired in about 15 minutes using standard fMRI sequences, although the post-processing algorithms used in this work are not currently available commercially.

The following BOLD sequence parameters were employed: 25 ms echo time (TE), 90° flip angle, 4 x 4 x 4 mm voxel size, acquisition time 2.012 seconds per whole brain volume. Whole brain coverage was obtained with 32 contiguous slices. The BOLD data were analyzed as previously described (28). Preprocessing included compensation for systematic, slice-dependent time shifts, correction of odd-even slice intensity differences and correction for rigid body head motion. Registration of the resting-state functional data was achieved by composition of affine transforms as follows: BOLD→T2W→MP-RAGE→atlas. Prior to correlation analysis, variance unlikely to represent local neuronal activity was removed by regression. These nuisance regressors included the BOLD signal averaged over white matter, CSF, and the whole brain as well the six rigid body parameters derived by head motion correction. Inter-regional correlations were computed using the Pearson product moment formula applied to regional time courses averaged over each ROI. Correlation maps were similarly computed between seed ROI and all other voxels in the brain. Each seed region was a 12-mm diameter sphere centered on previously reported Talairach coordinates (29, 30). These seeds included: left hippocampus (-21 -25 -14), and right hippocampus (23 -23 -14). For quantitative analysis, a 12 mm diameter sphere centered on area 24 of the ventral anterior cingulate cortex (-5 35 -4) was used. As there was some variability between subjects, analysis of correlations with the anterior thalami used two alternative 2 mm diameter spheres, centered on (7, -5, 3) or (8, -7, 7) for the right anterior thalamus and (-7, -5, 3) or (-8, -7, 7) for the left anterior thalami.

### Hippocampal Volumetry

Hippocampal volumetry was performed on each individual subject's high resolution MP-RAGE images transformed to atlas space and resampled to  $1 \text{ mm}^3$  voxels. Each hippocampus was manually traced using Analyze 6.1. The rostral border was the most anterior slice showing the emergence of the hippocampus from the inferior side of the amygdala; the caudal border was the slice displaying the fornices leaving the fimbria of the hippocampus. Volumes were calculated using the Cavalieri principle as previously described (31). The presently reported volumes include the hippocampal formation, dentate gyrus, alveus, and fimbria.

### DTI DATA RESULTS

| Relative Anisotropy               | Left Cingulum   | Right Cingulum  | Left Fornix     | Right Fornix    |
|-----------------------------------|-----------------|-----------------|-----------------|-----------------|
| Controls, (n=10<br>Mean $\pm$ SD) | 0.35 $\pm$ 0.02 | 0.37 $\pm$ 0.03 | 0.36 $\pm$ 0.03 | 0.34 $\pm$ 0.02 |
| Subject                           | 0.33            | 0.34            | 0.32            | 0.33            |

**NEUROPSYCHOLOGICAL TEST RESULTS**

| <b>TEST</b>                                       | <b>RAW SCORE</b> | <b>PERCENTILE</b> | <b>INTERPRETATION</b>    |
|---------------------------------------------------|------------------|-------------------|--------------------------|
| <b>Wechsler Abbreviated Scale of Intelligence</b> |                  |                   |                          |
| Vocabulary                                        | 53               | 39                | Average                  |
| Block Design                                      | 48               | 58                | Average                  |
| Similarities                                      | 37               | 66                | Average                  |
| Matrix Reasoning                                  | 30               | 82                | High Average             |
| Verbal IQ                                         | 100 (IQ score)   | 50                | Average                  |
| Performance IQ                                    | 108 (IQ score)   | 70                | Average                  |
| Full Scale IQ                                     | 105 (IQ score)   | 63                | Average                  |
| <b>Wechsler Memory Scale-III</b>                  |                  |                   |                          |
| Logical Memory I Recall Score                     | 31               | 16                | Low Average              |
| Logical Memory II Recall Score                    | 13               | 10                | Low Average              |
| Logical Memory II Percent Retention               | 59               | 5                 | Mildly Impaired          |
| Logical Memory Recognition                        | 19/30            | ...               |                          |
| Letter Number Sequencing                          | 12               | 64                | Average                  |
| <b>California Verbal Learning Test-II</b>         |                  |                   |                          |
| Trial I Recall Correct                            | 5                | 7                 | Borderline               |
| Trial II Recall Correct                           | 8                | 16                | Low Average              |
| Trial III Recall Correct                          | 9                | 7                 | Borderline               |
| Trial IV Recall Correct                           | 8                | <1                | Severely Impaired        |
| Trial V Recall Correct                            | 11               | 7                 | Borderline               |
| Trials 1-5 Total                                  | 41               | 7                 | Borderline               |
| Short Delay Free Recall                           | 8                | 7                 | Borderline               |
| Short Delay Cued Recall                           | 8                | <1                | Severely Impaired        |
| Total Intrusions                                  | 1                | 50                | Average                  |
| Total Repetitions                                 | 3                | 31                | Average                  |
| Long Delay Free Recall                            | 9                | 7                 | Borderline               |
| Long Delay Cued Recall                            | 8                | <1                | Severely Impaired        |
| Long Delay Recognition Hits                       | 12               | <1                | Severely Impaired        |
| Long Delay Recognition False Positives            | 5                | 7                 | Borderline               |
| Recognition Discriminability                      | 1.7              | <1                | Severely Impaired        |
| <b>Brief Visual Memory Test-Revised</b>           |                  |                   |                          |
| Trial 1                                           | 2                | <1                | Severely Impaired        |
| Trial 2                                           | 7                | 4                 | Mild-Moderately Impaired |
| Trial 3                                           | 10               | 21                | Low Average              |
| Total Recall                                      | 19               | 2                 | Severely Impaired        |
| Learning                                          | 5                | 79                | High Average             |
| Delayed Recall                                    | 8                | 3                 | Moderately Impaired      |
| Percent Retained                                  | 80               | 6-10%             | Low Average              |
| Recognition Hits                                  | 6                | >16               | Average                  |

|                                  |   |     |         |
|----------------------------------|---|-----|---------|
| Recognition False Alarms         | 0 | >16 | Average |
| Recognition Discrimination Index | 6 | >16 | Average |

*NOTE: Based on the patient's normal learning, percent retention and recognition scores, the consulting neuropsychologist did not feel that her visual memory deficit was clinically significant.*

|                                                 |    |     |               |
|-------------------------------------------------|----|-----|---------------|
| <b>Benton Judgment of Line Orientation Test</b> | 26 | 56  | Average       |
| <b>Symbol Digit Modalities Test</b>             |    |     |               |
| Written                                         | 49 | 28  | Average       |
| Oral                                            | 58 | 39  | Average       |
| <b>Auditory Naming Test</b>                     | 46 | 10  | Low Average   |
| <b>Wisconsin Card Sorting Test</b>              |    |     |               |
| Trials Administered                             | 70 | ... |               |
| Categories Completed                            | 6  | >16 | Average       |
| Perseverative Responses                         | 4  | >99 | Very Superior |
| Perseverative Errors                            | 4  | >99 | Very Superior |
| Failures to Maintain Set                        | 0  | >16 | Average       |

|                                               |            |    |              |
|-----------------------------------------------|------------|----|--------------|
| <b>Delis-Kaplan Executive Function System</b> |            |    |              |
| Trail Making Test                             | 13 seconds | 85 | High Average |
| Visual Scanning                               | 30 seconds | 50 | Average      |
| Number Sequencing                             | 21 seconds | 74 | High Average |
| Letter Sequencing                             | 82 seconds | 37 | Average      |
| Number-Letter Sequencing                      | 20 seconds | 74 | High Average |
| Motor Speed                                   |            |    |              |

|                                    |    |    |             |
|------------------------------------|----|----|-------------|
| <b>Verbal Fluency Test</b>         |    |    |             |
| Letter Fluency Total Correct       | 35 | 37 | Average     |
| Category Fluency Total Correct     | 34 | 25 | Average     |
| Category Switching: Total Correct  | 10 | 10 | Low Average |
| Category Switching: Total Accuracy | 8  | 10 | Low Average |

|                                                |    |    |         |
|------------------------------------------------|----|----|---------|
| <b>Wide Range Achievement Test-4th Edition</b> |    |    |         |
| Word Reading                                   | 61 | 53 | Average |
| Sentence Comprehension                         | 44 | 42 | Average |
| Spelling                                       | 42 | 42 | Average |
| Math Computation                               | 42 | 39 | Average |

**Conners' Continuous Performance Test-II** All scores within Average Range

**Barkley Scales of Attention Deficit  
Hyperactivity Disorder**

|                                          |    |    |                      |
|------------------------------------------|----|----|----------------------|
| Childhood Symptoms-Self Report           |    |    |                      |
| Inattention                              | 0  |    | Not Significant      |
| Hyperactivity                            | 0  |    | Not Significant      |
| Childhood Symptoms-Other Report (father) |    |    |                      |
| Inattention                              | 0  |    | Not Significant      |
| Hyperactivity                            | 0  |    | Not Significant      |
| Current Symptoms-Self Report             |    |    |                      |
| Inattention                              | 0  |    | Not Significant      |
| Hyperactivity                            | 0  |    | Not Significant      |
| Current Symptoms-Other Report (father)   |    |    |                      |
| Inattention                              | 0  |    | Not Significant      |
| Hyperactivity                            | 0  |    | Not Significant      |
| <b>Frontal Systems Behavior Scale</b>    |    |    |                      |
| Self Rating-Before Injury                |    |    |                      |
| Apathy                                   | 25 | 58 | Within Normal Limits |
| Disinhibition                            | 15 | 3  | Within Normal Limits |
| Executive Dysfunction                    | 22 | 14 | Within Normal Limits |
| Total                                    | 62 | 16 | Within Normal Limits |
| Self Rating-After Injury                 |    |    |                      |
| Apathy                                   | 23 | 42 | Within Normal Limits |
| Disinhibition                            | 15 | 3  | Within Normal Limits |
| Executive Dysfunction                    | 22 | 14 | Within Normal Limits |
| Total                                    | 60 | 14 | Within Normal Limits |
| Family Rating-Before Injury (father)     |    |    |                      |
| Apathy                                   | 22 | 50 | Within Normal Limits |
| Disinhibition                            | 17 | 7  | Within Normal Limits |
| Executive Dysfunction                    | 30 | 46 | Within Normal Limits |
| Total                                    | 69 | 27 | Within Normal Limits |
| Family Rating-After Injury (father)      |    |    |                      |
| Apathy                                   | 20 | 34 | Within Normal Limits |
| Disinhibition                            | 17 | 7  | Within Normal Limits |
| Executive Dysfunction                    | 23 | 16 | Within Normal Limits |
| Total                                    | 60 | 12 | Within Normal Limits |

**Supplementary References**

1. Le Bihan D. Looking into the functional architecture of the brain with diffusion MRI. *Nat Rev Neurosci*. 2003 Jun;4(6):469-80.
2. Inglese M, Makani S, Johnson G, Cohen BA, Silver JA, Gonen O, et al. Diffuse axonal injury in mild traumatic brain injury: a diffusion tensor imaging study. *J Neurosurg*. 2005 Aug;103(2):298-303.
3. Kraus MF, Susmaras T, Caughlin BP, Walker CJ, Sweeney JA, Little DM. White matter integrity and cognition in chronic traumatic brain injury: a diffusion tensor imaging study. *Brain*. 2007 Oct;130(Pt 10):2508-19.
4. Niogi SN, Mukherjee P, Ghajar J, Johnson C, Kolster RA, Sarkar R, et al. Extent of Microstructural White Matter Injury in Postconcussive Syndrome Correlates with Impaired Cognitive Reaction Time: A 3T Diffusion Tensor Imaging Study of Mild Traumatic Brain Injury. *AJNR Am J Neuroradiol*. 2008 Feb 26.
5. Wieshmann UC, Symms MR, Clark CA, Lemieux L, Parker GJ, Barker GJ, et al. Blunt-head trauma associated with widespread water-diffusion changes. *Lancet*. 1999 Apr 10;353(9160):1242-3.
6. Wilde EA, Chu Z, Bigler ED, Hunter JV, Fearing MA, Hanten G, et al. Diffusion tensor imaging in the corpus callosum in children after moderate to severe traumatic brain injury. *J Neurotrauma*. 2006 Oct;23(10):1412-26.
7. Xu J, Rasmussen IA, Lagopoulos J, Haberg A. Diffuse axonal injury in severe traumatic brain injury visualized using high-resolution diffusion tensor imaging. *J Neurotrauma*. 2007 May;24(5):753-65.
8. Huisman TA, Schwamm LH, Schaefer PW, Koroshetz WJ, Shetty-Alva N, Ozsunar Y, et al. Diffusion tensor imaging as potential biomarker of white matter injury in diffuse axonal injury. *AJNR Am J Neuroradiol*. 2004 Mar;25(3):370-6.
9. Nakayama N, Okumura A, Shinoda J, Yasokawa YT, Miwa K, Yoshimura SI, et al. Evidence for white matter disruption in traumatic brain injury without macroscopic lesions. *J Neurol Neurosurg Psychiatry*. 2006 Jul;77(7):850-5.
10. Rugg-Gunn FJ, Symms MR, Barker GJ, Greenwood R, Duncan JS. Diffusion imaging shows abnormalities after blunt head trauma when conventional magnetic resonance imaging is normal. *J Neurol Neurosurg Psychiatry*. 2001 Apr;70(4):530-3.
11. Albeni BC, Knobloch SM, Chew BG, O'Reilly MP, Faden AI, Pekar JJ. Diffusion and high resolution MRI of traumatic brain injury in rats: time course and correlation with histology. *Exp Neurol*. 2000 Mar;162(1):61-72.
12. Duhaime AC, Hunter JV, Grate LL, Kim A, Golden J, Demidenko E, et al. Magnetic resonance imaging studies of age-dependent responses to scaled focal brain injury in the piglet. *J Neurosurg*. 2003 Sep;99(3):542-8.
13. Mac Donald CL, Dikranian K, Bayly P, Holtzman D, Brody D. Diffusion tensor imaging reliably detects experimental traumatic axonal injury and indicates approximate time of injury. *J Neurosci*. 2007 Oct 31;27(44):11869-76.
14. Mac Donald CL, Dikranian K, Song SK, Bayly PV, Holtzman DM, Brody DL. Detection of traumatic axonal injury with diffusion tensor imaging in a mouse model of traumatic brain injury. *Exp Neurol*. 2007 May;205(1):116-31.
15. Van Putten HP, Bouwhuis MG, Muizelaar JP, Lyeth BG, Berman RF. Diffusion-weighted imaging of edema following traumatic brain injury in rats: effects of secondary hypoxia. *J Neurotrauma*. 2005 Aug;22(8):857-72.

16. Shimony JS, Burton H, Epstein AA, McLaren DG, Sun SW, Snyder AZ. Diffusion tensor imaging reveals white matter reorganization in early blind humans. *Cereb Cortex*. 2006 Nov;16(11):1653-61.
17. Rowland DJ, Garbow JR, Laforest R, Snyder AZ. Registration of [18F]FDG microPET and small-animal MRI. *Nuclear medicine and biology*. 2005 Aug;32(6):567-72.
18. Talairach J, Tournoux P. *Co-Planar Stereotaxic Atlas of the Human Brain*. New York: Thieme Medical Publishers; 1988.
19. Ojemann JG, Akbudak E, Snyder AZ, McKinstry RC, Raichle ME, Conturo TE. Anatomic localization and quantitative analysis of gradient refocused echo-planar fMRI susceptibility artifacts. *Neuroimage*. 1997 Oct;6(3):156-67.
20. Woolsey TA, Hanaway J, Gado MH. *The Brain Atlas, 2nd Edition: A visual guide to the human central nervous system*. Hoboken, New Jersey: John Wiley & Sons, Inc.; 2003.
21. Conturo TE, Lori NF, Cull TS, Akbudak E, Snyder AZ, Shimony JS, et al. Tracking neuronal fiber pathways in the living human brain. *Proc Natl Acad Sci U S A*. 1999 Aug 31;96(18):10422-7.
22. Mori S, Crain BJ, Chacko VP, van Zijl PC. Three-dimensional tracking of axonal projections in the brain by magnetic resonance imaging. *Ann Neurol*. 1999 Feb;45(2):265-9.
23. Fox MD, Raichle ME. Spontaneous fluctuations in brain activity observed with functional magnetic resonance imaging. *Nat Rev Neurosci*. 2007 Sep;8(9):700-11.
24. Biswal B, Yetkin FZ, Haughton VM, Hyde JS. Functional connectivity in the motor cortex of resting human brain using echo-planar MRI. *Magn Reson Med*. 1995 Oct;34(4):537-41.
25. He BJ, Snyder AZ, Vincent JL, Epstein A, Shulman GL, Corbetta M. Breakdown of functional connectivity in frontoparietal networks underlies behavioral deficits in spatial neglect. *Neuron*. 2007 Mar 15;53(6):905-18.
26. Horowitz SG, Fukunaga M, de Zwart JA, van Gelderen P, Fulton SC, Balkin TJ, et al. Low frequency BOLD fluctuations during resting wakefulness and light sleep: A simultaneous EEG-fMRI study. *Hum Brain Mapp*. 2007 Jun 27.
27. Vincent JL, Patel GH, Fox MD, Snyder AZ, Baker JT, Van Essen DC, et al. Intrinsic functional architecture in the anaesthetized monkey brain. *Nature*. 2007 May 3;447(7140):83-6.
28. Fox MD, Snyder AZ, Vincent JL, Corbetta M, Van Essen DC, Raichle ME. The human brain is intrinsically organized into dynamic, anticorrelated functional networks. *Proc Natl Acad Sci U S A*. 2005 Jul 5;102(27):9673-8.
29. Tian L, Jiang T, Wang Y, Zang Y, He Y, Liang M, et al. Altered resting-state functional connectivity patterns of anterior cingulate cortex in adolescents with attention deficit hyperactivity disorder. *Neurosci Lett*. 2006 May 29;400(1-2):39-43.
30. Vincent JL, Snyder AZ, Fox MD, Shannon BJ, Andrews JR, Raichle ME, et al. Coherent spontaneous activity identifies a hippocampal-parietal memory network. *Journal of neurophysiology*. 2006 Dec;96(6):3517-31.
31. Buckner RL, Head D, Parker J, Fotenos AF, Marcus D, Morris JC, et al. A unified approach for morphometric and functional data analysis in young, old, and demented adults using automated atlas-based head size normalization: reliability and validation against manual measurement of total intracranial volume. *Neuroimage*. 2004 Oct;23(2):724-38.
